# Supplementary material for: Lifestyle Factors in UK Veterans’ Reintegration to Civilian Life: A Qualitative Exploration
Source: Research Square preprint supplement (doi:10.21203/rs.3.rs-8412508/v1), 2026-01-08
Supplement: Supplementary file 1 [file 4fe3e04e5ecc54a81fb0de6c.docx]

**Semi‑structured questions used for participant interviews.**

**Nutrition**

1. How would you describe your current approach to nutrition and diet?
2. How has your diet changed since leaving the military?
3. Did your time in the military shape your eating habits or food preferences?
4. What challenges do you face in maintaining a healthy diet?
5. What nutrition resources did you have access to in the military or newly leaving?

**Alcohol**

1. Describe your experience with alcohol in the military and what your relationship with alcohol has been since you left?
2. What factors influence your alcohol consumption?
3. What role, if any, does alcohol play in your social interactions or coping mechanisms?
4. Are there any habits you’ve adopted to manage or reduce alcohol consumption?

**Lifestyle**

1. What aspects of military life have influenced your current lifestyle choices?
2. How has your support network and social interactions changed since the military?
3. Describe your sleep habits during and after the military.
4. Can you tell me if you ever smoked in the military or after?

**Physical Fitness**

1. Describe your overall physical fitness and how that may have changed since the military.
2. How do you feel physical exercise may have impacted your mental health/wellbeing?

**Wellbeing**

1. What coping mechanisms do you use to maintain mental and emotional health?
2. How has your sense of community or support network influenced your overall wellbeing?
3. Describe your overall wellbeing since leaving the military.
4. How do you feel nutrition choices or alcohol may have affected your overall/mental wellbeing as a veteran?
5. What role has physical or mental health played in your overall wellbeing post-service?

**Resources**

1. How accessible and effective have you found resources tailored to veterans, if used?
2. What changes would you make in terms of your wellbeing, alcohol consumption or diet?
3. What do you feel is most misunderstood about veterans?
4. Do you have anything else you would like to discuss or explain further?
